# Supplementary material for: Fabrication of Cu2O/Ag composite nanoframes as surface-enhanced Raman scattering substrates in a successive one-pot procedure
Source: Royal Society of Chemistry journal article supplement (doi:10.1039/c3ce42052c), 2014-01-01

Electronic supplementary information

## **Fabrication of Cu<sub>2</sub>O/Ag composite nanoframes surface-enhanced Raman scattering substrates in a successive one-pot procedure**

Lihua yang, Jian Lv, Yongming Sui, Wuyou Fu, Xiaoming Zhou, Jinwen Ma, Shi Su, Wenjiao Zhang, Pin Lv, Di Wu, Yannan Mu, Haibin Yang\*

*State Key Laboratory of Superhard Materials, Jilin University, Changchun 130012, P. R. China*

\*Corresponding author: Tel.: +86 431 85168763, fax: +86 431 85168763.

E-mail: [yanghb@jlu.edu.cn](mailto:yanghb@jlu.edu.cn)

### **Synthesis of Ag nanoparticles (NPs)**

The Ag NPs with an average size of 100 nm were prepared by sodium citrate reducing AgNO<sub>3</sub> aqueous solution. Typically, 0.12g AgNO<sub>3</sub> was dispersed in 76 mL of deionized water, followed by addition of 4 ml of sodium mixture solution (0.74 M sodium citrate and 1.2 M sodium carbonate mixed solution) slowly. After the mixture was stirred for 10 min, 6 g PVP (K-30; Mw=30 000) was mixed with vigorous stirring in a round-bottomed glass flask. After the complete dissolution of the PVP powder, the solution was kept in a water bath at a temperature of 80 °C for 20 min, yielding the gray Ag NPs.

---

\* Corresponding Author Tel.: +86 431 85168763; fax: +86 431 85168763.

E-mail address: [yanghb@jlu.edu.cn](mailto:yanghb@jlu.edu.cn)

**Figure S1.** (A) FESEM and (B) XRD of the bare Ag NPs prepared by reduction of silver nitrate with trisodium citrate

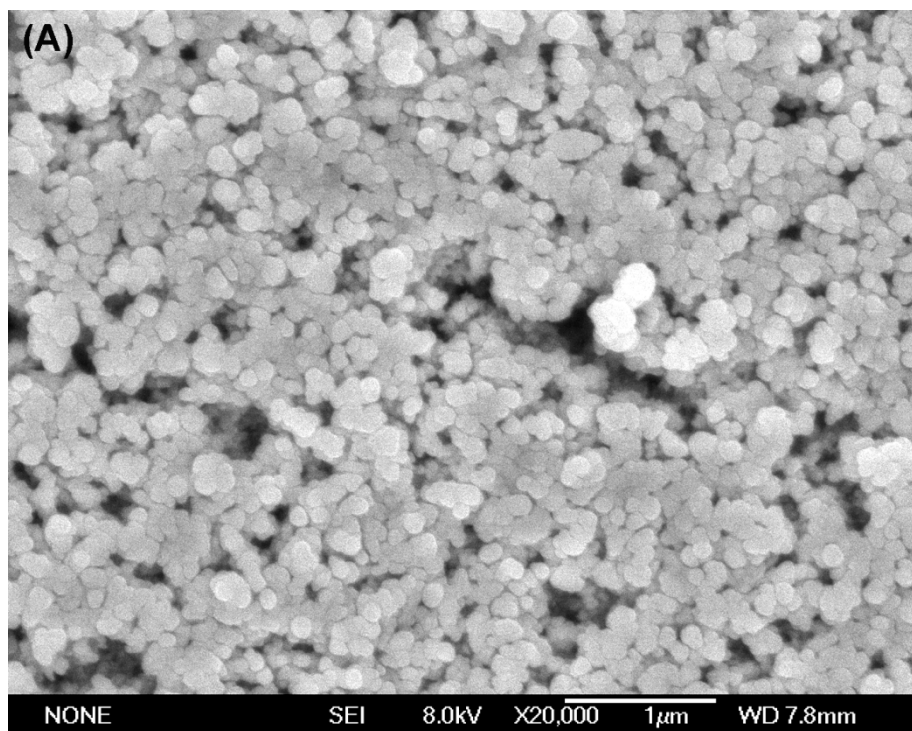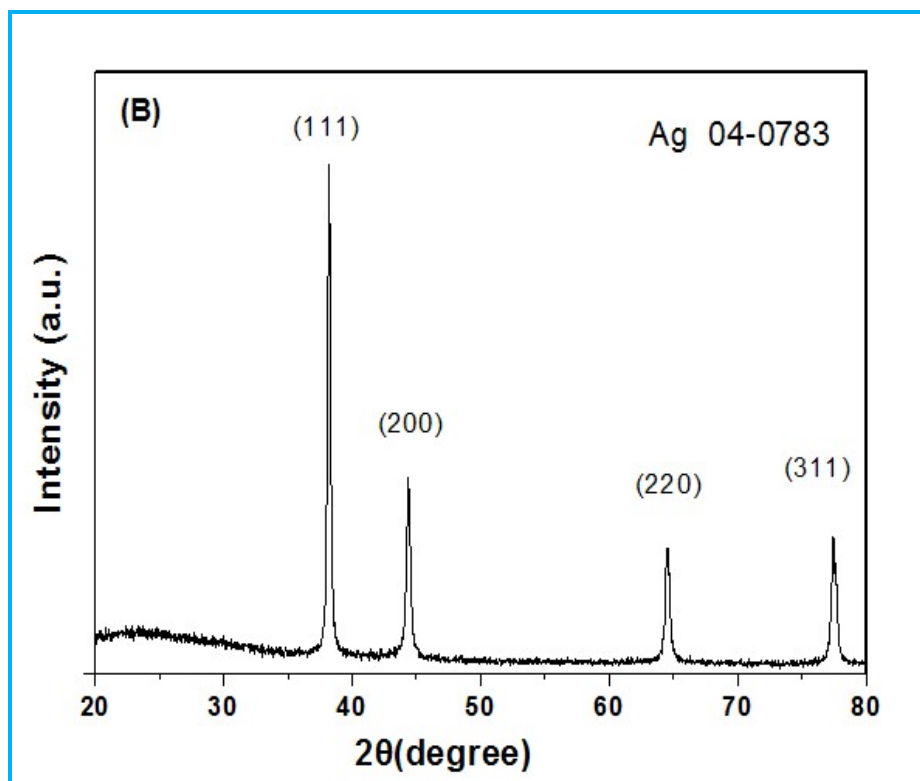

**Figure S2.** (A) TEM image of as-prepared  $\text{Cu}_2\text{O}/\text{Ag}(2)$  CNFs. (B) and (C) HRTEM images of  $\text{Cu}_2\text{O}/\text{Ag}(2)$  CNFs shown in (A), revealing Ag have grown on (111) and (110) of  $\text{Cu}_2\text{O}$ , respectively. (D), (E), (F) and (G) STEM images and STEM-EDX elemental mapping of the sample ( $\text{Cu}_2\text{O}/\text{Ag}(2)$  CNFs), revealing the homogeneous distribution of Ag elements over the  $\text{Cu}_2\text{O}/\text{Ag}(2)$  CNFs (the superabundant Cu elements in (F) arise from copper TEM grid).

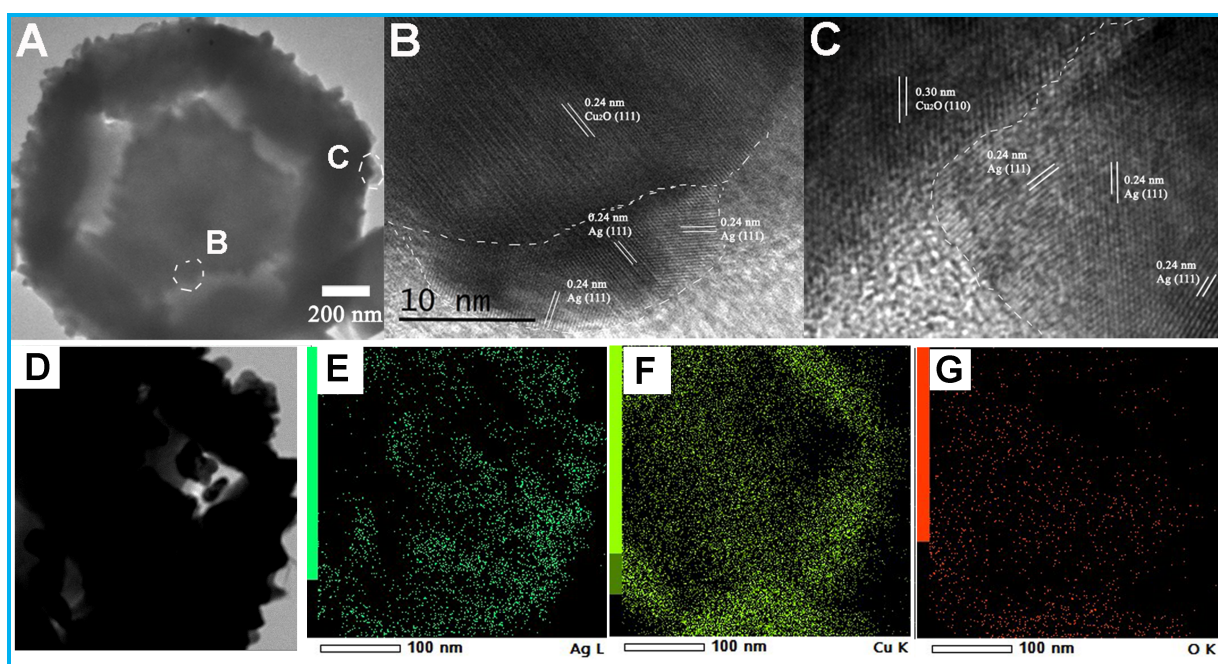

**Figure S3.** Raman spectra of (a) RB with concentration of  $10^{-2}$  M and (b) RB with concentration of  $10^{-8}$  M adsorbed on  $\text{Cu}_2\text{O}/\text{Ag}(2)$  CNFs.

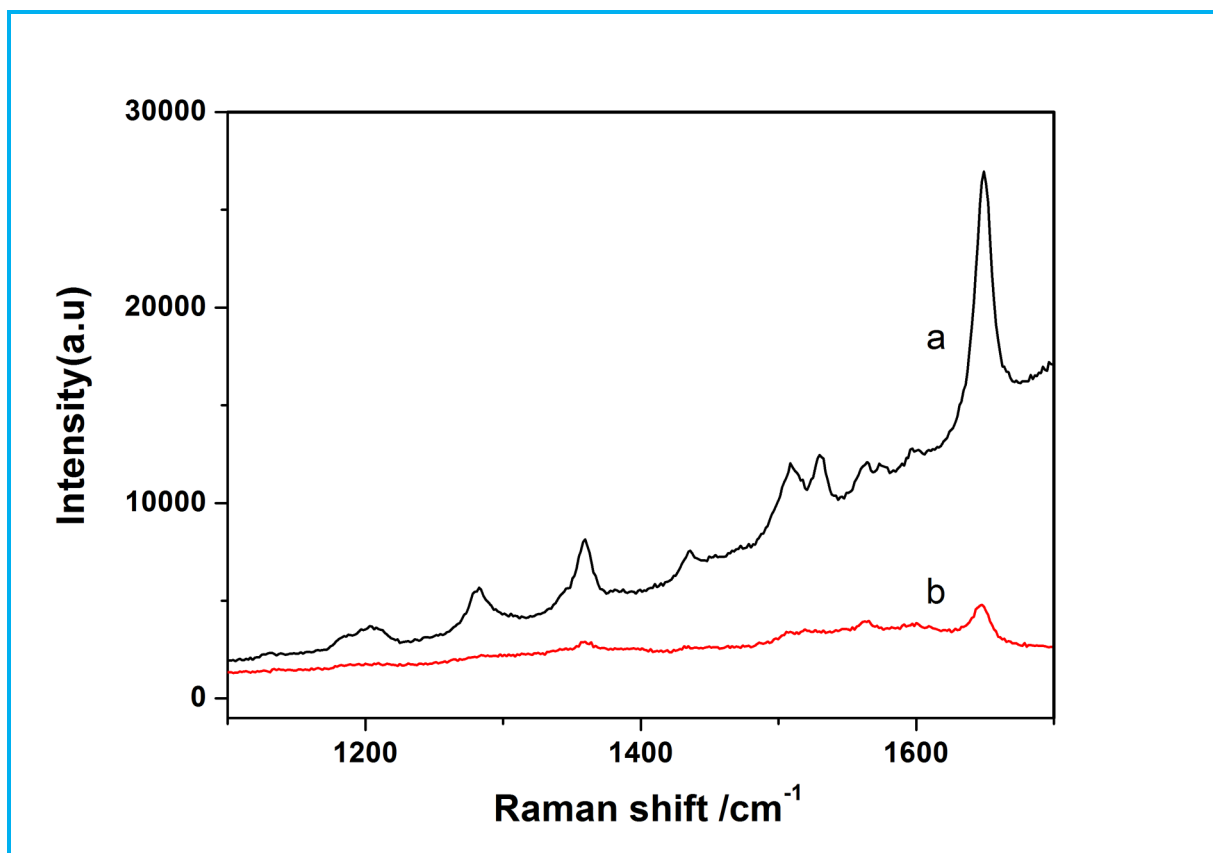

Supplement: c3ce42052c.pdf [file c3ce42052c.pdf]
